# Supplementary material for: Mechanistic examination of AuIII-mediated 1,5-enyne cycloisomerization by AuBr2(N-imidate)(NHC)/AgX precatalysts – is the active catalyst AuIII or AuI?
Source: Royal Society of Chemistry journal article supplement (doi:10.1039/c4cy00617h), 2014-01-01
Supplement: c4cy00617h1.pdf [file c4cy00617h1.pdf]

## Electronic Supporting Information

### Mechanistic examination of Au<sup>III</sup>-mediated 1,5-enyne cycloisomerization by AuBr<sub>2</sub>(*N*-imidate)(NHC) / AgX precatalysts – is the active catalyst Au<sup>III</sup> or Au<sup>I</sup>?

Jonathan P. Reeds, Mark P. Healy and Ian J. S. Fairlamb\*

#### Additional NMR spectroscopic investigations

The spectral data for the additional NMR spectroscopic investigations mentioned in the paper are detailed below.

#### Reaction of AuBr<sub>2</sub>(*N*-TFS)(I'Pe) with AgOTf in acetone-*d*<sub>6</sub>

The <sup>19</sup>F NMR spectroscopic data mentioned in the paper is given below (the <sup>1</sup>H NMR spectroscopic data is given in the paper, Figure 7).

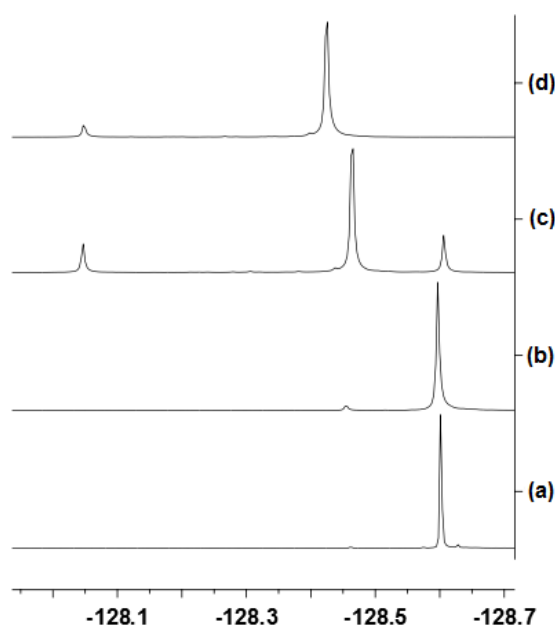

**Figure S1.** <sup>19</sup>F NMR spectroscopic analysis of the reaction of AuBr<sub>2</sub>(*N*-TFS)(I'Pe) with AgOTf in acetone-*d*<sub>6</sub> over time. Key: (a) AuBr<sub>2</sub>(*N*-TFS)(I'Pe) in acetone-*d*<sub>6</sub> (reference spectrum); (b) AuBr<sub>2</sub>(*N*-TFS)(I'Pe) + AgOTf (1:1) after 10 mins; (c) as for (b) after 4.5 h; (d) as for (b) after 22.5 h

**Comment:** the <sup>19</sup>F signal seen evolving at  $\delta$  -128.46 corresponds to Au(*N*-TFS)(I'Pe) {spectrum (d)}. A second minor signal at  $\delta$  -128.1 ppm, which may relate to free tetrafluorosuccinimide (or *N*-bromotetrafluorosuccinimide), was observed. This signal has a maximum intensity after 4.5 h {spectrum (c)}, and then is reduced after 22.5 h. A possible explanation is that the free ligand recombined with [Au(I'Pe)]<sup>+</sup> to form Au(*N*-TFS)(I'Pe) {or exchanged with [Au(I'Pe)Br]}. This

would suggest that reduction of  $\text{AuBr}_2(\text{N-TFS})(\text{I}^t\text{Pe})$  to  $\text{Au}(\text{N-TFS})(\text{I}^t\text{Pe})$  occurs *via* loss of tetrafluorosuccinimide anion or *N*-bromotetrafluorosuccinimide. A small amount of hydrolysed tetrafluorosuccinimide was also observed in these  $^{19}\text{F}$  NMR spectra.

### Reaction of $\text{AuBr}_2(\text{N-TFS})(\text{I}^t\text{Pe})$ with $\text{Ag}[\text{Al}(\text{OC}(\text{CF}_3)_3)_4]$ in acetone- $d_6$

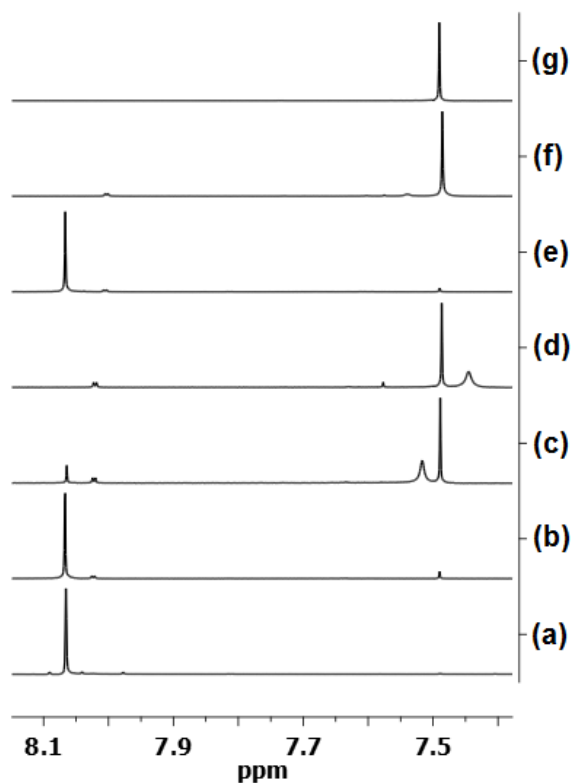

**Figure S2.** Stacked  $^1\text{H}$  NMR spectra (expanded section) showing the reaction of  $\text{AuBr}_2(\text{N-TFS})(\text{I}^t\text{Pe})$  with  $\text{Ag}[\text{Al}(\text{OC}(\text{CF}_3)_3)_4]$  in acetone- $d_6$  over time (monitoring the  $\text{I}^t\text{Pe}$  imidazole proton signal by  $^1\text{H}$  NMR spectroscopy, referenced to the residual acetone solvent signal at  $\delta$  2.05). Key: (a)  $\text{AuBr}_2(\text{N-TFS})(\text{I}^t\text{Pe})$  in acetone- $d_6$  (reference spectrum); (b)  $\text{AuBr}_2(\text{N-TFS})(\text{I}^t\text{Pe}) + \text{Ag}[\text{Al}(\text{OC}(\text{CF}_3)_3)_4]$  (1:1) after 10 mins; (c) as for (b) after 7 h; (d) as for (b) after 24 h; (e) comparison of reaction of  $\text{AuBr}_2(\text{N-TFS})(\text{I}^t\text{Pe})$  with  $\text{AgOTf}$  after 10 mins; (f) as for (e) after 22.5 h; (g)  $\text{Au}(\text{N-TFS})(\text{I}^t\text{Pe})$  in acetone- $d_6$  (reference spectrum).

**Comment:** The reaction afforded  $\text{Au}(\text{N-TFS})(\text{I}^t\text{Pe})$  and a new broad signal at slightly higher chemical shift  $\{\delta$  7.52; spectrum (c) $\}$ , which is suggested to be  $[\text{Au}(\kappa^1\text{-O}=\text{CMe}_2)(\text{I}^t\text{Pe})]^+[\text{Al}(\text{OC}(\text{CF}_3)_3)_4]^-$ . This broad signal does move up-field after 24 h  $\{\text{spectrum (d)}\}$ .

### Reaction of AuBr<sub>2</sub>(*N*-TFS)(*I'*Pe) with AgOTf and varying equivalents of 1-hexene

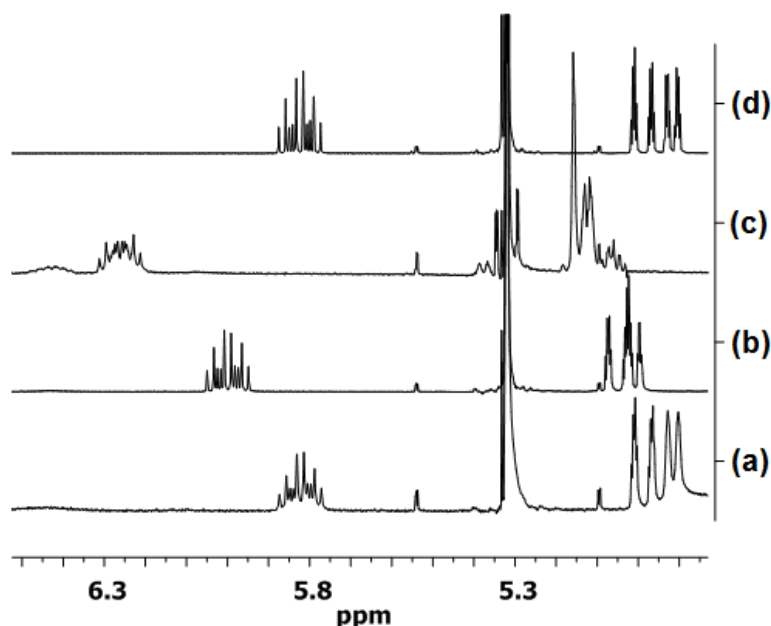

**Figure S3.** Stacked <sup>1</sup>H NMR spectra (expanded section) showing the reaction of AuBr<sub>2</sub>(*N*-TFS)(*I'*Pe) with AgOTf (1 equiv.) and varying equivalents of 1-hexene over time in CD<sub>2</sub>Cl<sub>2</sub> (referenced to the residual CDHCl<sub>2</sub> solvent signal at 5.31 ppm). Key: (a) AuBr<sub>2</sub>(*N*-TFS)(*I'*Pe) / AgOTf with 2 equivalents of 1-hexene after 24 h; (b) AuBr<sub>2</sub>(*N*-TFS)(*I'*Pe) / AgOTf with 2 equivalents of 1-hexene after 10 mins; (c) AuBr<sub>2</sub>(*N*-TFS)(*I'*Pe) / AgOTf with 1 equivalent of 1-hexene after 10 mins; (d) 1-hexene alone in CD<sub>2</sub>Cl<sub>2</sub>.

**Comment:** No binding of 1-hexene to the neutral Au<sup>III</sup> imidate complexes occur in the absence of AgOTf. AuBr<sub>2</sub>(*N*-TFS)(*I'*Pe) / AgOTf (1:1) in the presence of 1 equivalent of 1-hexene shows no change in the imidazole signal but the alkene signals are shifted downfield (*ca.* 0.44 ppm, *spectrum c*). Also, another species is detected in this spectrum (visible against the baseline at *ca.* 6.4-6.5 ppm); other minor proton signals accompany this signal at *ca.* 4.9-5.4 ppm). The reaction of 2 equivalents of 1-hexene shows a smaller shift in the alkene signals shift (*ca.* 0.18 ppm), with little change in spin-spin coupling constants relative to free 1-hexene (after 10 mins, *spectrum b*). After 24 h the proton signals are closer to free 1-hexene, but broad (compare *spectrum a* with *spectrum d*). In control tests it was found that 1-hexene can bind AgOTf independently.
